# Supplementary material for: A simple structural hydrazide-based gelator as a fluoride ion colorimetric sensor
Source: Royal Society of Chemistry journal article supplement (doi:10.1039/c4ob00056k), 2014-01-01
Supplement: c4ob00056k1.pdf [file c4ob00056k1.pdf]

## Supporting information

### Simple Structural Hydrazone-based Gelator as a Fluoride Ion Colorimetric Sensor

**Binglian Bai<sup>\*a,b</sup>, Jie Ma<sup>b</sup>, Jue Wei<sup>b</sup>, Jianxi Song<sup>a</sup>, Haitao Wang<sup>a</sup> and Min Li<sup>a\*</sup>**

*<sup>a</sup> Key Laboratory for Automobile Materials (JLU), Ministry of Education. College of  
Materials Science and Engineering, Jilin University, Changchun 130012, PR China. <sup>b</sup>*

*College of Physics, Jilin University, Changchun 130012, PR China.*

\* Corresponding author

Tel: +86-431-85168254

E-mail: [baibinglian@jlu.edu.cn](mailto:baibinglian@jlu.edu.cn), [minli@mail.jlu.edu.cn](mailto:minli@mail.jlu.edu.cn)

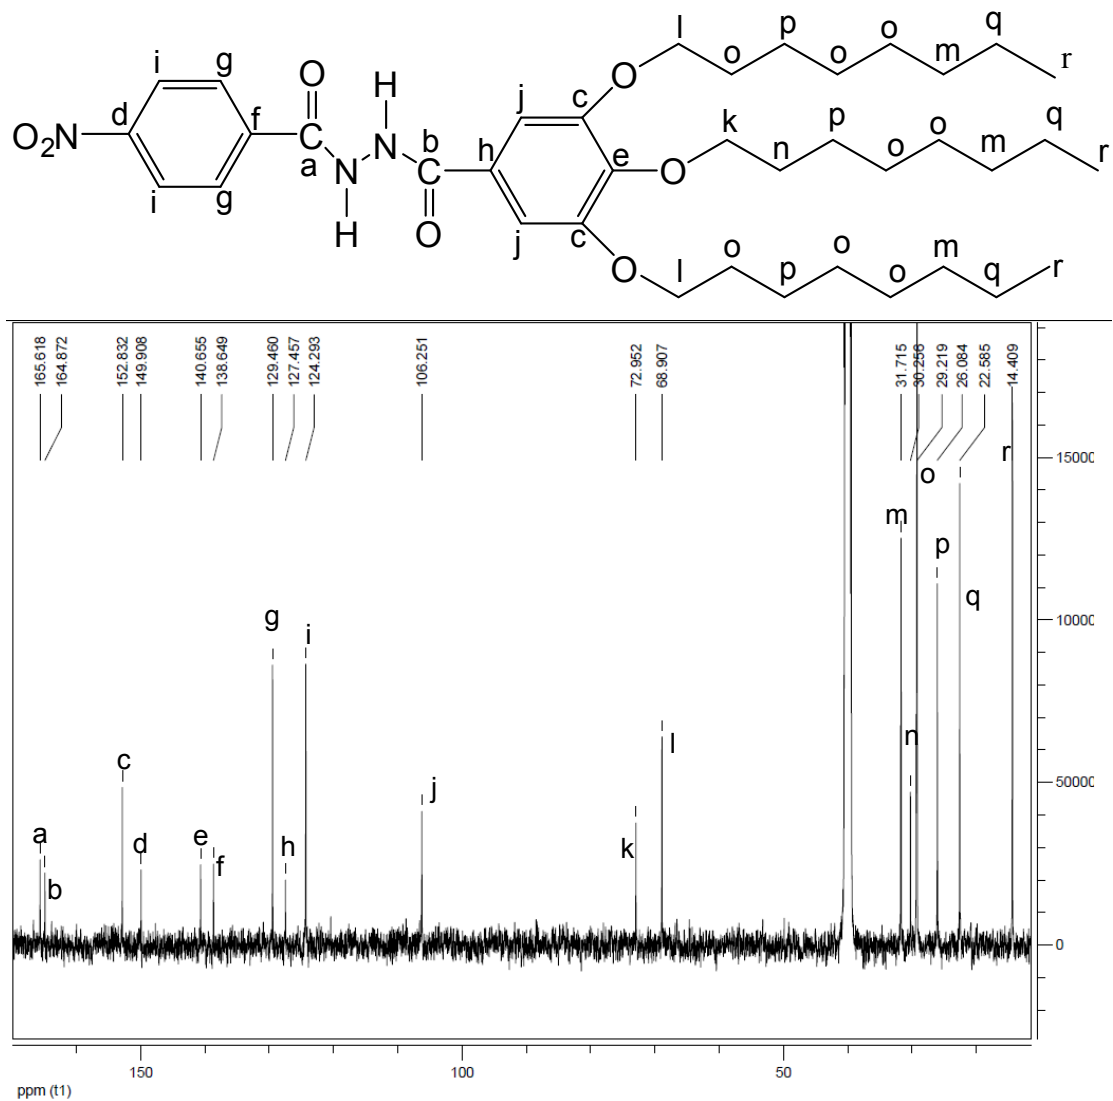

Fig. S1  $^{13}\text{C}$  NMR spectra ( $\delta$  10-170 ppm region shown;  $\text{DMSO-}d_6$ ; 500MHz) of C8.

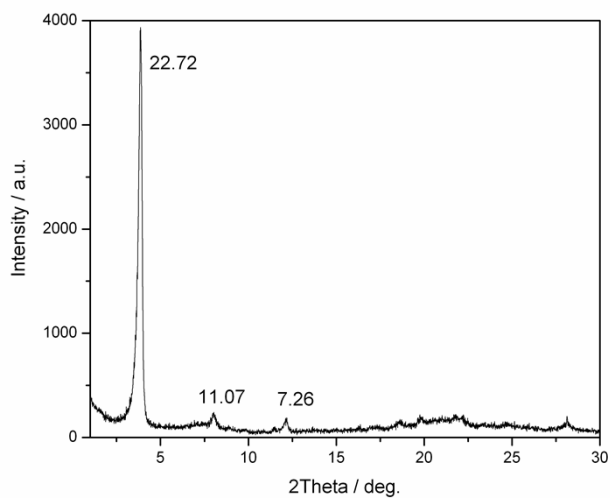

Fig. S2 XRD pattern of C8 xerogel from cyclohexane.

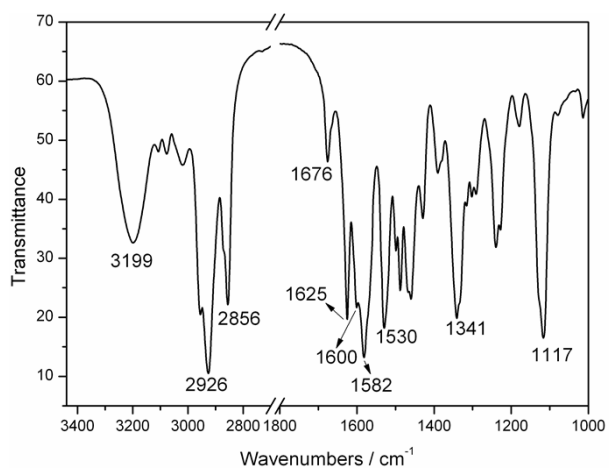

Fig. S3 FT-IR spectrum of the xerogel of C8 from cyclohexane.

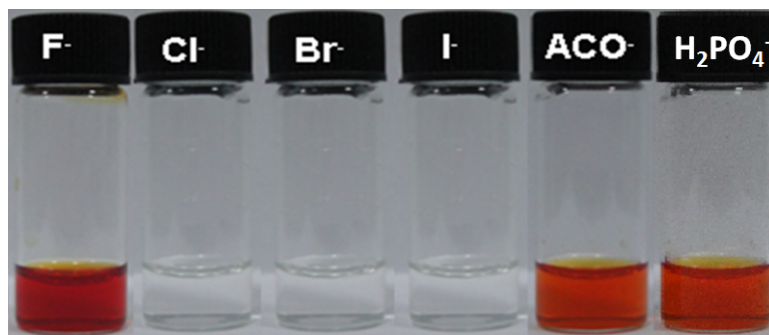

Fig. S4 The color changes of C8 ( $1 \times 10^{-2}$  mol/L) upon addition of 35 equiv. various anions in acetonitrile.

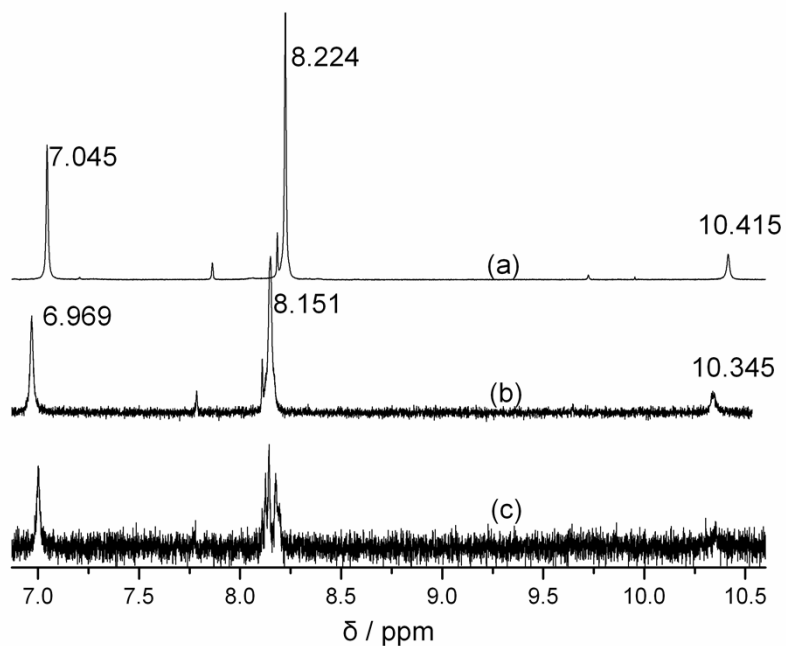

Fig. S5 Partial proton NMR spectra (500 MHz, DMSO-*d*<sub>6</sub>, 25 °C) of compound (C8 and 2 equiv. TBAF) at different concentrations: (a)  $1 \times 10^{-2}$  mol/L, (b)  $1 \times 10^{-4}$  mol/L, (c)

$1 \times 10^{-5}$  mol/L.

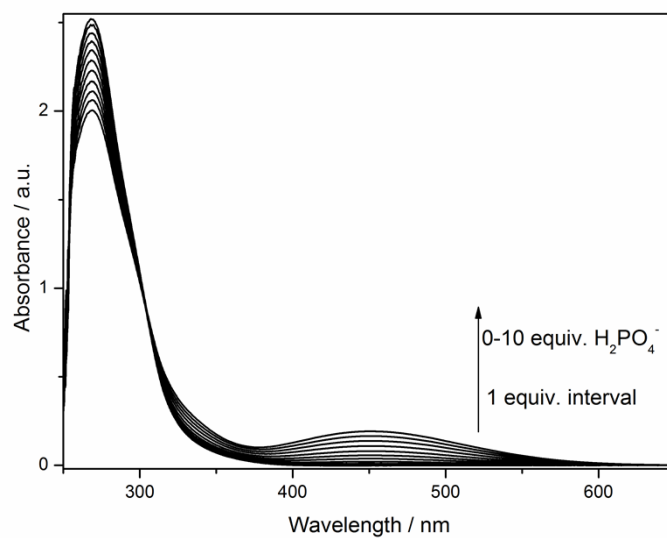

Fig. S6 Absorbance spectra changes of C8 ( $3 \times 10^{-4}$  mol/L) upon the addition of 0–10 equiv.  $\text{H}_2\text{PO}_4^-$  in DMSO.

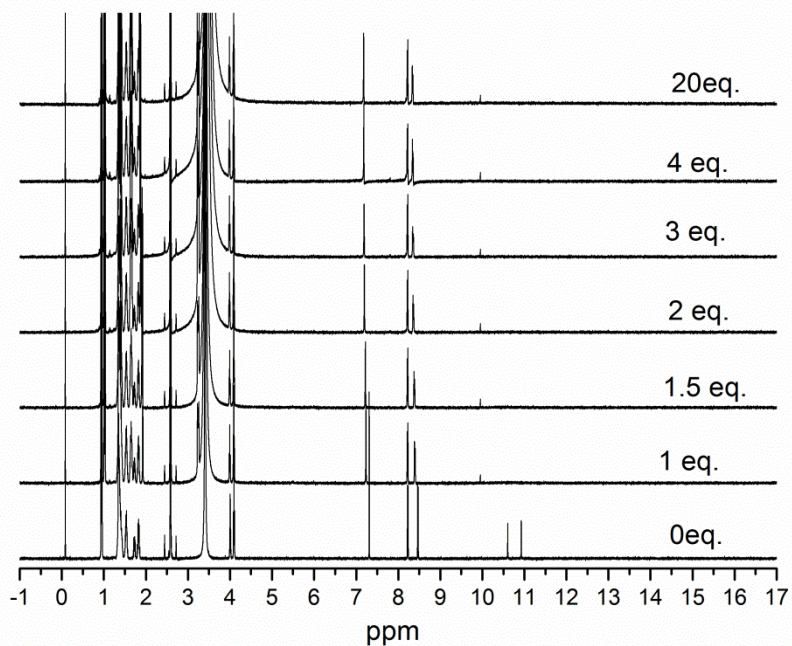

Fig. S7 Plots of  $^1\text{H}$  NMR spectra of C8 ( $2 \times 10^{-3}$  mol/L) upon the addition of  $\text{AcO}^-$  in  $\text{DMSO}-d_6$ .

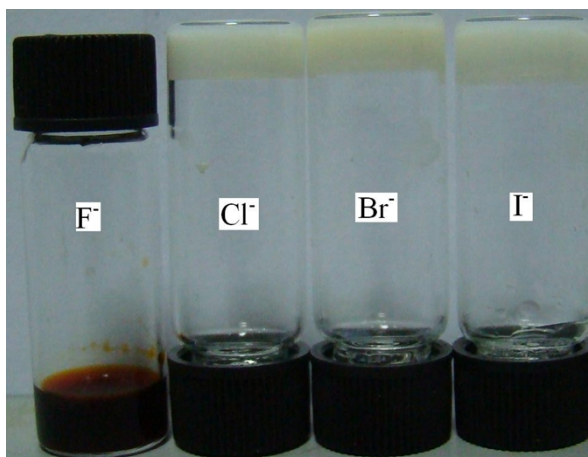

Fig. S8 Organogels formed from a solution of C8 in acetonitrile (3.86 wt%) after addition 35 equiv of solid various anions.

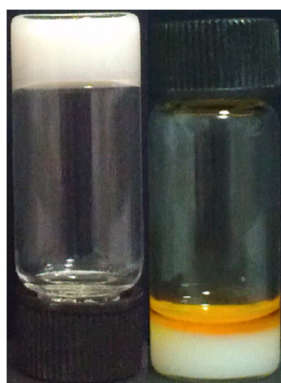

Fig. S9 The changes in the ethanol gel (3.65 wt%) after addition of THF solution of [Bu<sub>4</sub>N]F (1 equiv.)

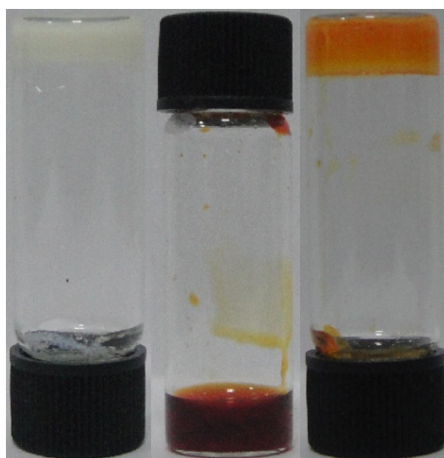

Fig. S10 Organogel formed from a solution of C8 in acetonitrile (3.86 wt%, left); after addition of solid AcO<sup>-</sup> (8 equiv., middle); after addition of 20  $\mu$ l methanol (right).
